# Supplementary material for: Reactivity control of a photocatalytic system by changing the light intensity
Source: Royal Society of Chemistry journal article supplement (doi:10.1039/c9sc04584h), 2019-01-01
Supplement: c9sc04584h2.pdf [file c9sc04584h2.pdf]

# Switching Photocatalytic Properties With Light-intensity

Inspired by photosynthesis, photocatalysts are activated by light irradiation and can be used for different reactions...

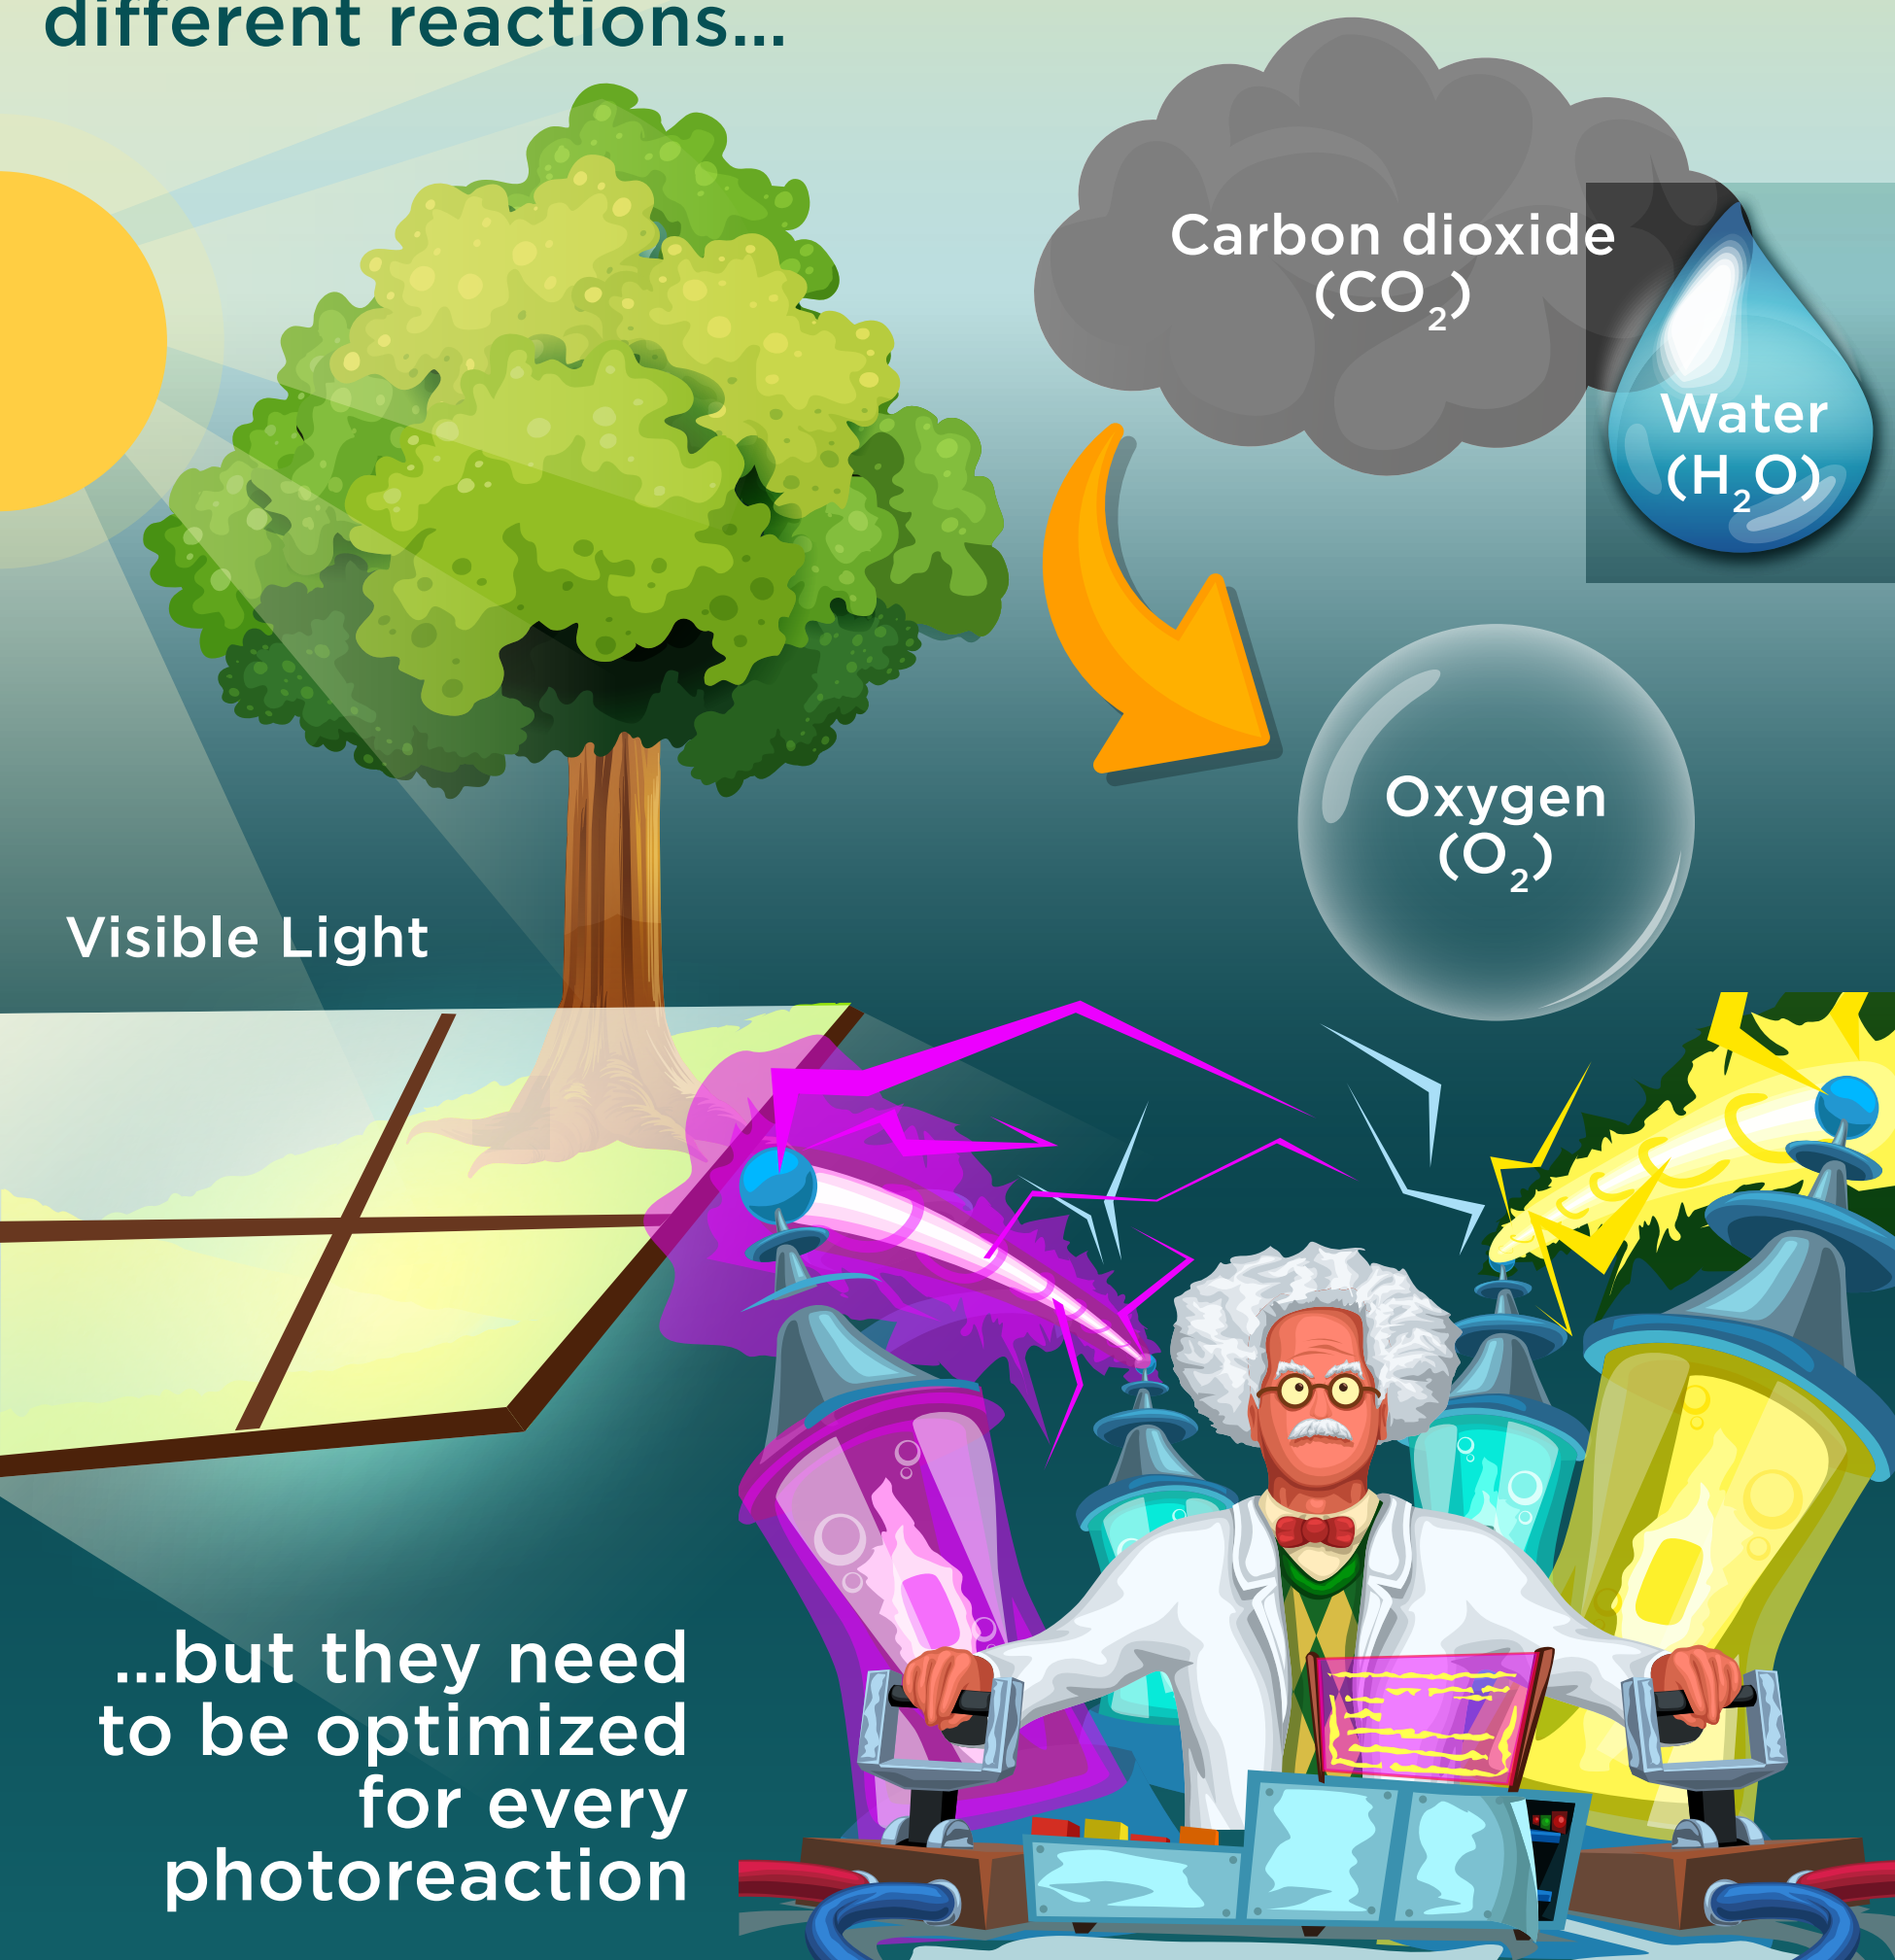

Can we just change the light intensity to vary the properties of a photocatalyst?

A blue diode (447 nm) as the light source and an inexpensive lens was used to regulate the light intensity

Same substrates on irradiation with blue light through lens and without lens give entirely different products under identical conditions

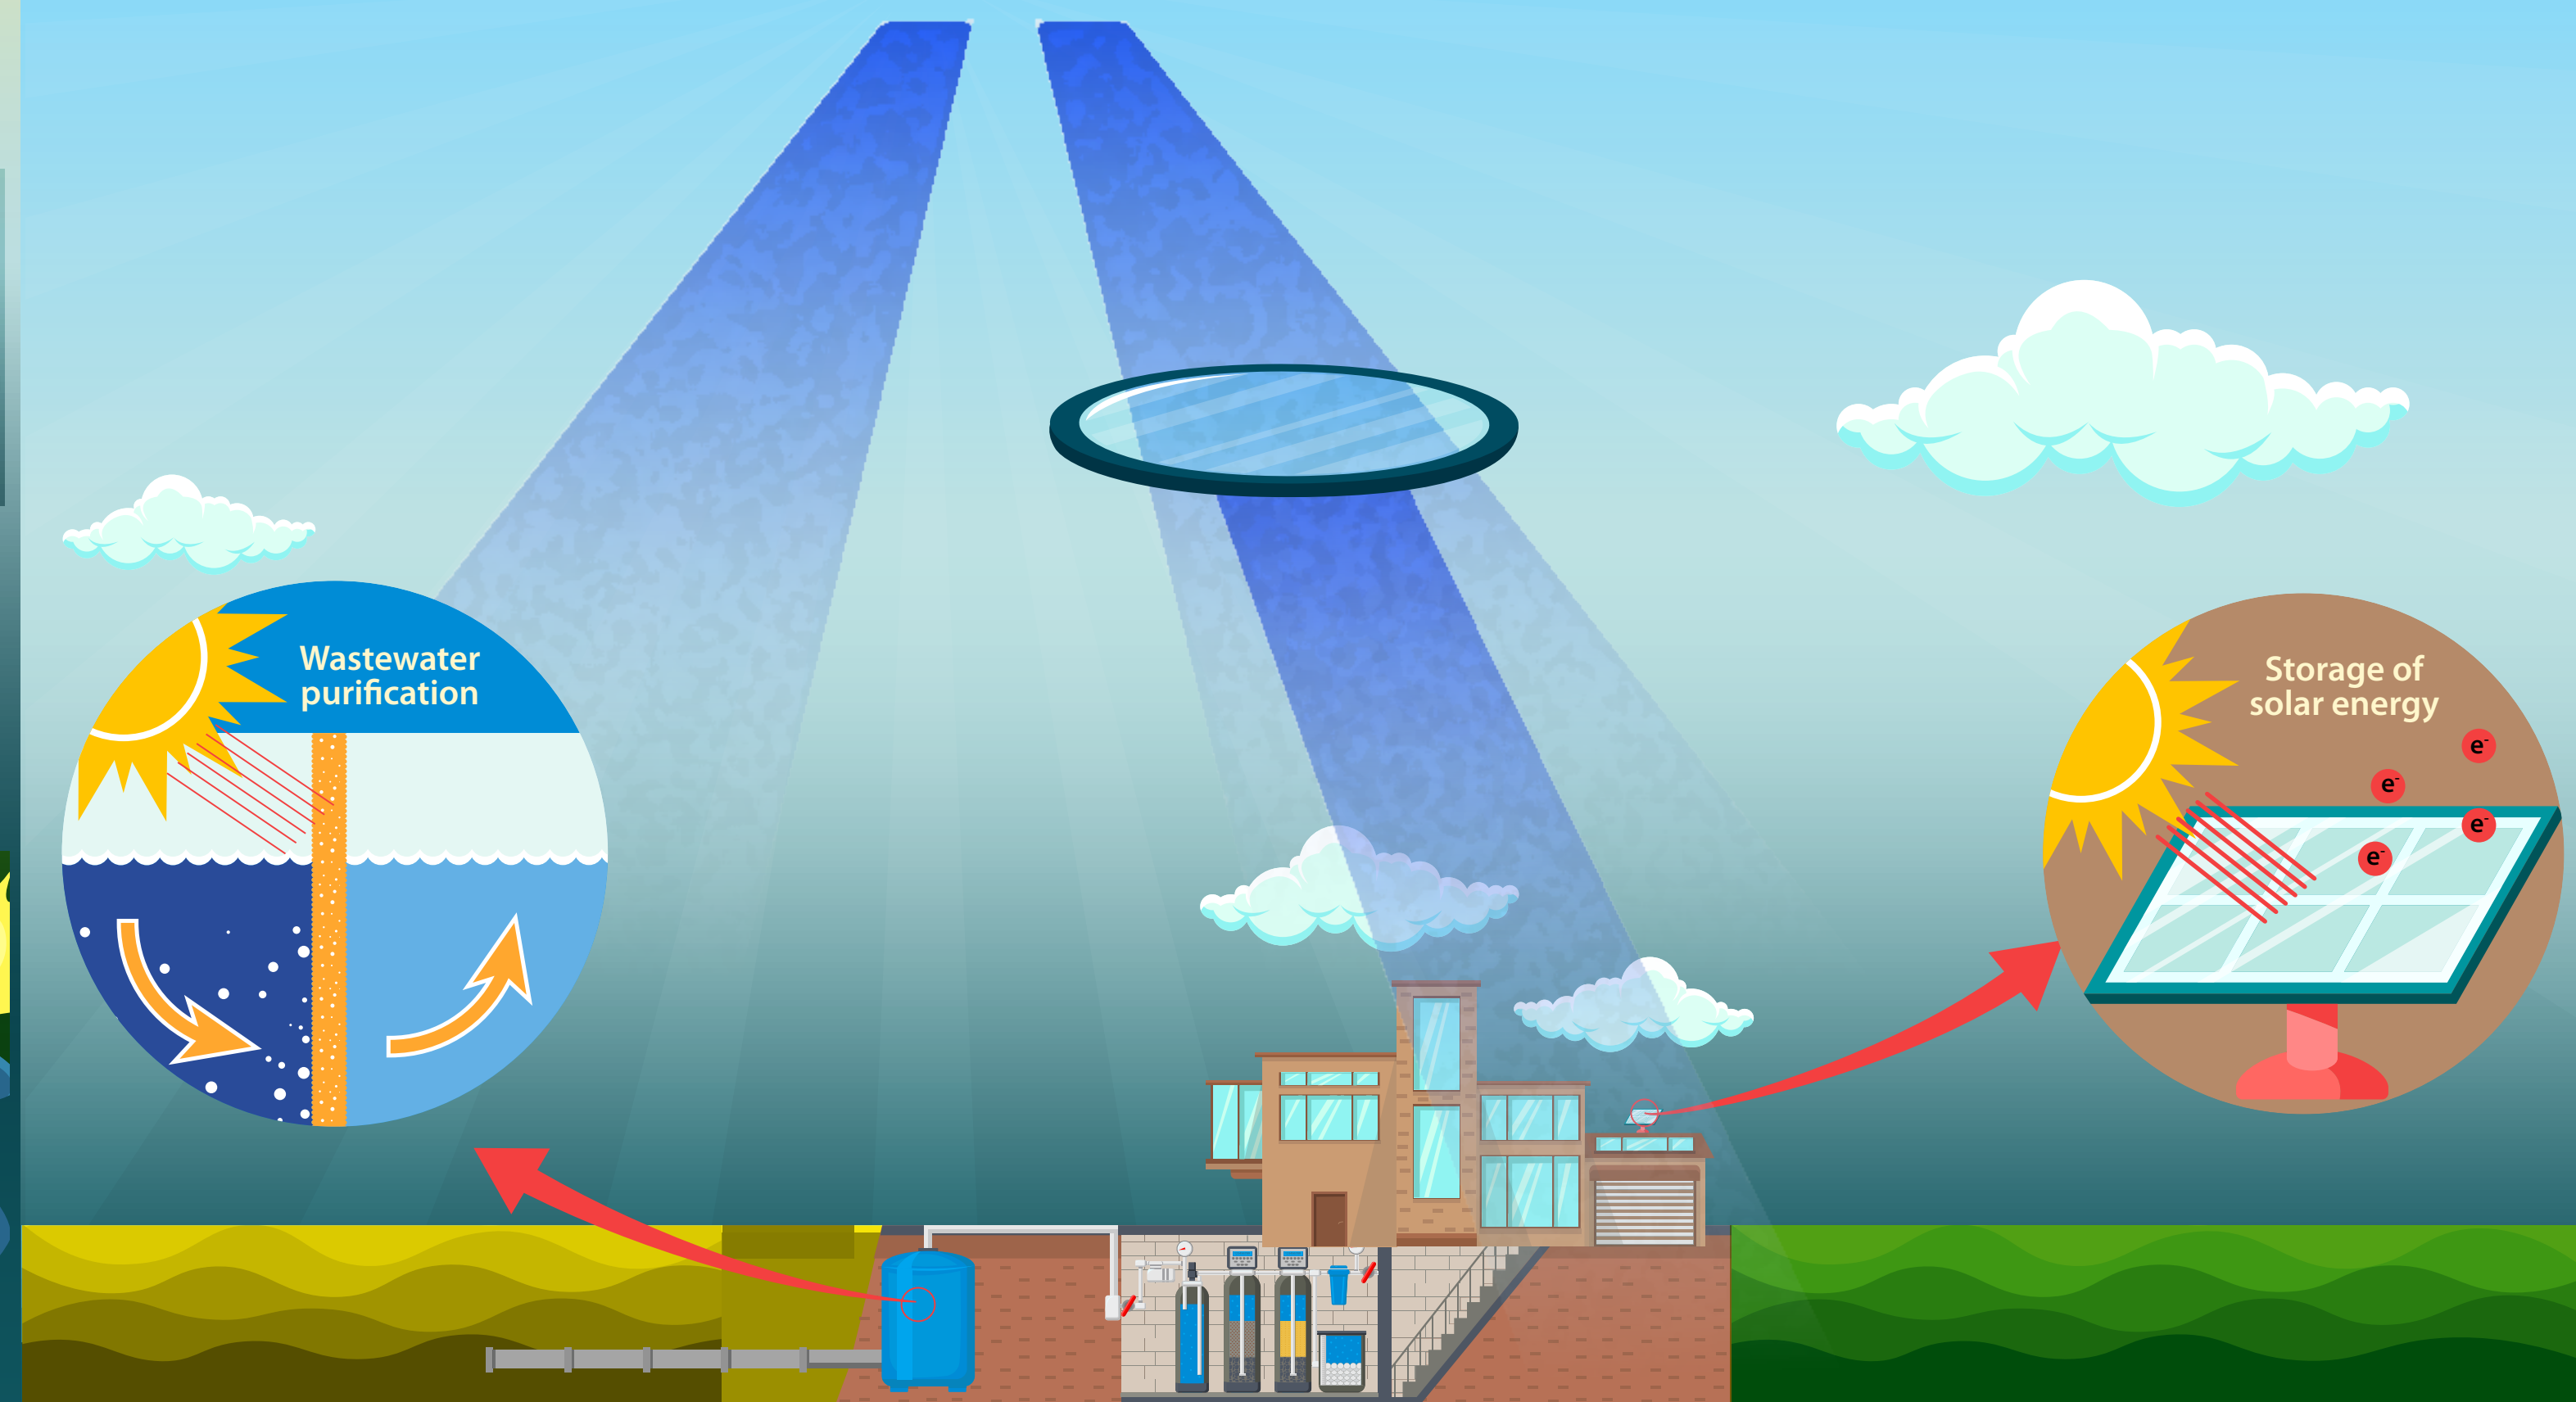

The combination of a single photocatalytic system and a blue light source can be exploited for a variety of chemical reactions by altering light intensity

Chemical  
Science

PICK  
OF THE  
WEEK

Reactivity control of a photocatalytic system by changing the light intensity

Kerzig and Wenger

DOI: 10.1039/C9SC04584H

ROYAL SOCIETY  
OF CHEMISTRY
